# Supplementary material
Source: PubMed Central journal article supplement (PMC3685899)
Supplement: supp_blood-2012-06-436345_blood-2012-06-436345-1.pdf [file supp_blood-2012-06-436345_blood-2012-06-436345-1.pdf]

**Table S1: Changes in %HLA-DR+ and %CD38+ T cells during Maraviroc Intensification.**

| Biomarker             | <u>Placebo</u> (n=22) |                                                            |         | <u>Maraviroc</u> (n=23) |                                                            |         | Between-Arm |
|-----------------------|-----------------------|------------------------------------------------------------|---------|-------------------------|------------------------------------------------------------|---------|-------------|
|                       | Baseline Median (%)   | Mean $\Delta$ from Wk 0-24 in log <sub>10</sub> % (95% CI) | P Value | Baseline Median (%)     | Mean $\Delta$ from Wk 0-24 in log <sub>10</sub> % (95% CI) | P Value | P Value     |
| %HLA-DR+ CD8+ T Cells | 28.7                  | -0.04 (-0.007 to -0.04)                                    | 0.026   | 37.9                    | +0.05 (0.004 to 0.09)                                      | 0.031   | <0.001      |
| %HLA-DR+ CD4+ T Cells | 22.9                  | -0.07 (-0.12 to -0.03)                                     | 0.002   | 25.9                    | -0.001 (-0.05 to 0.05)                                     | 0.96    | 0.15        |
| %CD38+ CD8+ T Cells   | 40.1                  | -0.02 (-0.07 to 0.03)                                      | 0.40    | 45.6                    | +0.01 (-0.05 to 0.06)                                      | 0.77    | 0.061       |
| %CD38+ CD4+ T Cells   | 60.5                  | -0.03 (-0.06 to 0.005)                                     | 0.098   | 61.2                    | -0.01 (-0.05 to 0.02)                                      | 0.39    | 0.20        |

**Table S2: Changes in T Cell Activation in Fresh (non-Cryopreserved) PBMC during Maraviroc Intensification.**

| Biomarker                          | <u>Placebo</u> (n=8) |                                          |         | <u>Maraviroc</u> (n=7) |                                          |         | Between-Arm |
|------------------------------------|----------------------|------------------------------------------|---------|------------------------|------------------------------------------|---------|-------------|
|                                    | Baseline Median (%)  | Mean $\Delta$ from Wk 0-22 in % (95% CI) | P Value | Baseline Median (%)    | Mean $\Delta$ from Wk 0-22 in % (95% CI) | P Value | P Value     |
| %CD38+HLA-DR+ CD8+ T cells (fresh) | 8.0                  | +1.8 (-3.8 to 7.4)                       | 0.52    | 8.7                    | +5.5 (-1.8 to 12.7)                      | 0.14    | 0.45        |
| %CD38+HLA-DR+ CD4+ T cells (fresh) | 6.8                  | -5.3 (-9.5 to -1.0)                      | 0.015   | 6.9                    | +4.6 (0.1 to 9.2)                        | 0.045   | 0.002       |

**Figure S3: Frequency of CCR5+ T cells in Peripheral Blood and Rectal Tissue by Maturational Phenotype.** The frequency of CCR5+ CD8+ (A) and CD4+ T cells (B) in peripheral blood (green) and rectal tissue (purple) are plotted by maturational phenotypes defined according to CD45RA and CCR7 expression. Samples were obtained from the date of rectal biopsy prior to the baseline visit and data from both the maraviroc and placebo arms are combined. All differences between peripheral blood and rectal biopsies within each maturational subset were statistically significant by Wilcoxon signrank test (P=0.003 for all).

**Figure S1:**

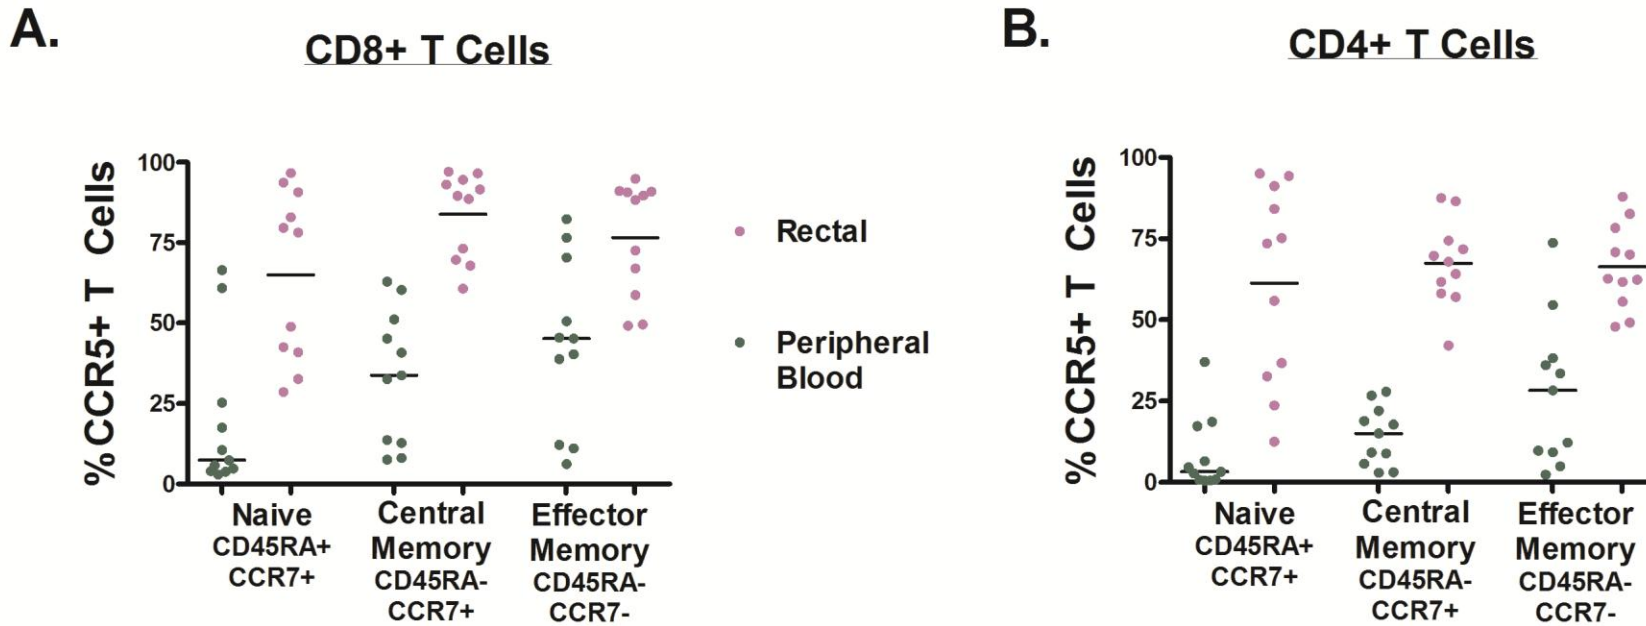

**Table S4: Changes in Rectal T Cell Maturation Phenotype Frequencies during Maraviroc Intensification.**

| Biomarker                     | <u>Placebo</u> (n=8) |                                          |         | <u>Maraviroc</u> (n=7) |                                          |         | Between-Arm |
|-------------------------------|----------------------|------------------------------------------|---------|------------------------|------------------------------------------|---------|-------------|
|                               | Baseline Median (%)  | Mean $\Delta$ from Wk 0-22 in % (95% CI) | P Value | Baseline Median (%)    | Mean $\Delta$ from Wk 0-24 in % (95% CI) | P Value | P Value     |
| %Naive CD8+ T Cells           | 3.0                  | +1.4 (-1.3 to 4.0)                       | 0.32    | 3.4                    | +0.8 (-2.0 to 3.6)                       | 0.57    | 0.74        |
| %Central Memory CD8+ T Cells  | 69.8                 | +1.7 (-12.6 to 16.1)                     | 0.81    | 71.6                   | +8.2 (-1.9 to 18.4)                      | 0.11    | 0.48        |
| %Effector Memory CD8+ T Cells | 24.4                 | -2.8 (-15.1 to 9.4)                      | 0.65    | 19.7                   | -8.5 (-15.3 to -1.6)                     | 0.02    | 0.44        |
| %TEMRA CD8+ T Cells           | 0.9                  | +0.004 (-2.9 to 3.0)                     | 0.99    | 1.1                    | -0.6 (-1.7 to 0.6)                       | 0.34    | 0.74        |
| %Naive CD4+ T Cells           | 2.2                  | -0.5 (-1.3 to 0.3)                       | 0.19    | 3.3                    | +0.3 (-1.5 to 2.1)                       | 0.74    | 0.40        |
| %Central Memory CD4+ T Cells  | 78.9                 | +1.1 (-9.0 to 11.2)                      | 0.83    | 78.9                   | +6.6 (-1.9 to 15.2)                      | 0.13    | 0.42        |
| %Effector Memory CD4+ T Cells | 19.7                 | -0.6 (-10.8 to 9.7)                      | 0.91    | 16.9                   | -6.9 (-14.3 to 0.5)                      | 0.07    | 0.33        |
| %TEMRA CD4+ T Cells           | 0.1                  | -0.01 (-0.3 to 0.3)                      | 0.95    | 0.06                   | -0.04 (-0.1 to 0.03)                     | 0.25    | 0.90        |

**Table S5: Changes in Soluble IL-6 and D-Dimer Levels during Maraviroc Intensification.**

| <b>Biomarker</b>       | <b><u>Placebo</u></b>        |                                                      |                | <b><u>Maraviroc</u></b>      |                                                      |                | <b>Between-Arm</b> |
|------------------------|------------------------------|------------------------------------------------------|----------------|------------------------------|------------------------------------------------------|----------------|--------------------|
|                        | <b>Baseline Median (IQR)</b> | <b>Mean log<sub>10</sub> Δ from Wk 0-24 (95% CI)</b> | <b>P Value</b> | <b>Baseline Median (IQR)</b> | <b>Mean log<sub>10</sub> Δ from Wk 0-24 (95% CI)</b> | <b>P Value</b> | <b>P Value</b>     |
| <b>IL-6 (pg/ml)</b>    | 1.3 (0.6 to 1.9)             | -0.07 (-0.3 to 0.08)                                 | 0.34           | 1.1 (0.7 to 1.6)             | +0.01 (-0.2 to 0.2)                                  | 0.93           | 0.37               |
| <b>D-dimer (ng/ml)</b> | 172 (116 to 251)             | +0.11 (-0.0005 to 0.21)                              | 0.051          | 147 (93 to 241)              | +0.08 (-0.07 to 0.23)                                | 0.32           | 0.77               |
